# Supplementary material for: Identification of long non-coding RNAs that stimulate cell survival in bladder cancer
Source: PubMed Central journal article supplement (PMC5470981; doi:10.18632/oncotarget.16284), 2017-03-16
Supplement: oncotarget-08-34442-s001.pdf [file oncotarget-08-34442-s001.pdf]

## Identification of long non-coding RNAs that stimulate cell survival in bladder cancer

### Supplementary Materials

**Supplementary Table 1: Primers, antisense oligonucleotide (ASO) and siRNAs sequences**

| Primers                    |                                |                         |
|----------------------------|--------------------------------|-------------------------|
| Gene                       | Forward primer (5'→3')         | Reverse primer (5'→3')  |
| ACTB                       | CGTCTTCCCCTCCATCGTG            | GATGGGGTACTTCAGGGTGA    |
| CAT266                     | GCTCATTGCCCTCAAGTGTT           | AGGACTGCCTGAGACCATGA    |
| CAT1297                    | TGGGATTACAAAATGCGTGA           | CATGGCAGCAGCAAGTAGAA    |
| CAT1647                    | GGCTAACAGATGCCCAGATG           | AACTGGCCACAGCAGAGATT    |
| HP1BP3                     | TGGAATATGCAATCTTGTCTGC         | GAACCCCTTCCAGAGATCTG    |
| RNU6                       | CGCTTCGGCAGCACATATAC           | AGGGGCCATGCTAATCTTCT    |
| Antisense oligonucleotides |                                |                         |
| Name                       | Target sequence (5'→3')        | Antisense oligo (5'→3') |
| CAT266-ASO1                | CAACAAUGGAGCCCCAAGUG           | CACTTGGGGCTCCATTGTTG    |
| CAT266-ASO2                | ACAUUGGCAUUAGCCUUAUC           | GATAAGGCTAATGCCAATGT    |
| CAT1297-ASO1               | GAAAACAAUUCACCUCUUGC           | GCAAGAGGTGAATTGTTTTTC   |
| CAT1297-ASO2               | GUUCUCUACAACCUCACCU            | AGGTGGAGGTTGTAGAGAAC    |
| CAT1647-ASO1               | UCACUGUCUCUUACUAAAGC           | GCTTTAGTAAGAGACAGTGA    |
| CAT1647-ASO2               | GAUUCAAUUGCUCACCUCUU           | AAGAGGTGAGCAATTGAATC    |
| CTRL-ASO1 (38)             | <i>none</i>                    | AAGCGCGCACCAGCGCCTCC    |
| CTRL-ASO2 (39)             | <i>none</i>                    | CCTTCCCTGAAGGTTCTCTCC   |
| siRNAs                     |                                |                         |
| Name                       | Sense siRNA (5'→3')            | Antisense siRNA (5'→3') |
| CAT266-siRNA               | GCUGGAAUUACAGGUUAUAATT         | UUAUACCUGUAAUUCCAGCTT   |
| CAT1297-siRNA1             | CUCAUGACAACUCUUAUUUTT          | AAAUAAAGAGUUGUCAUGAGTT  |
| CAT1297-siRNA2             | GAAACACACACACACUCUUTT          | AAGAGUGUGUGUGUUUUCTT    |
| CAT1647-siRNA1             | ACUGUCUCUUACUAAAGCUTT          | AGCUUUAGUAAGAGACAGUTT   |
| CAT1647-siRNA2             | GGAAACACCUUCACAGACUTT          | AGUCUGUGAAGGUGUUUCCTT   |
| CTRL-siRNA 1               | Silencer Negative Control No.1 | (AM4611, Ambion)        |

**Supplementary Table 2: Clinical characteristics of patients used for validation**

|                                | <b>NMIBC <i>n</i> = 18</b> |                                 | <b>MIBC <i>n</i> = 47</b> |
|--------------------------------|----------------------------|---------------------------------|---------------------------|
| <b>Age</b><br>(average, range) | 61 (50–77)                 | <b>Age</b><br>(average, range ) | 67 (37–84)                |
| <b>Gender</b>                  |                            | <b>Gender</b>                   |                           |
| female                         | 4                          | female                          | 15                        |
| male                           | 14                         | male                            | 32                        |
| <b>Stage</b>                   |                            | <b>Stage</b>                    |                           |
| pTa                            | 9                          | pT2                             | 11                        |
| pT1                            | 7                          | pT3                             | 22                        |
| CIS                            | 2                          | pT4                             | 12                        |
|                                |                            | unknown                         | 2                         |
| <b>Grade</b>                   |                            | <b>Grade</b>                    |                           |
| G1                             | 1                          | G2                              | 5                         |
| G2                             | 9                          | G3                              | 36                        |
| G3                             | 6                          | unknown                         | 6                         |
| unknown                        | 2                          |                                 |                           |

**Supplementary Table 3: The 25 most up-regulated lncRNAs in MIBC identified based on average expression levels using MiTranscriptome data**

| Transcript# | Name                 | Average expression |            | T/N ratio | Median expression |            | T/N ratio | P-value <sup>s</sup> |
|-------------|----------------------|--------------------|------------|-----------|-------------------|------------|-----------|----------------------|
|             |                      | Benign (N)         | Cancer (T) |           | Benign (N)        | Cancer (T) |           |                      |
| T102457     | <i>CAT1647.6</i>     | 0                  | 0.155      | > 100     | 0                 | 0.069      | > 100     | < 0.001              |
| T047629     | <i>CAT1297.4</i>     | 0                  | 0.128      | > 100     | 0                 | 0.077      | > 100     | < 0.001              |
| T078005     | <i>CAT1507</i>       | 0.001              | 0.296      | > 100     | 0                 | 0.096      | > 100     | < 0.001              |
| T290558     | <i>THCAT68.1</i>     | 0.002              | 0.128      | 60.98     | 0                 | 0.042      | > 100     | < 0.001              |
| T253942     | <i>CAT467.2</i>      | 0.002              | 0.132      | 53.84     | 0                 | 0.053      | > 100     | < 0.001              |
| T235647     | <i>CAT2260.3</i>     | 0.003              | 0.108      | 38.80     | 0                 | 0.045      | > 100     | < 0.001              |
| T108430     | <i>CAT1695</i>       | 0.005              | 0.138      | 29.88     | 0                 | 0.020      | > 100     | < 0.001              |
| T047638     | <i>LACAT97</i>       | 0.030              | 0.777      | 26.03     | 0                 | 0.474      | > 100     | < 0.001              |
| T065634     | <i>CAT1409</i>       | 0.005              | 0.139      | 25.92     | 0                 | 0.068      | > 100     | < 0.001              |
| T207213     | <i>CAT367</i>        | 0.035              | 0.887      | 25.31     | 0.011             | 0.367      | 31.71     | < 0.001              |
| T247881     | <i>LSCAT103</i>      | 0.007              | 0.174      | 24.44     | 0                 | 0.029      | > 100     | < 0.001              |
| T318530     | <i>CAT904.4</i>      | 0.006              | 0.147      | 24.44     | 0                 | 0.075      | > 100     | < 0.001              |
| T087060     | <i>CAT1573</i>       | 0.006              | 0.137      | 23.60     | 0                 | 0.024      | > 100     | < 0.001              |
| T362906     | <i>CAT1167</i>       | 0.005              | 0.114      | 23.50     | 0                 | 0.019      | > 100     | < 0.001              |
| T256721     | <i>CAT491.2</i>      | 0.005              | 0.104      | 22.13     | 0                 | 0.056      | > 100     | < 0.001              |
| T074211     | <i>LSCAT131</i>      | 0.005              | 0.114      | 21.28     | 0                 | 0.055      | > 100     | < 0.001              |
| T108891     | <i>BRCAT116</i>      | 0.008              | 0.166      | 19.50     | 0                 | 0.048      | > 100     | < 0.001              |
| T196786     | <i>MIR4435-1HG.1</i> | 0.008              | 0.159      | 19.47     | 0                 | 0.032      | > 100     | < 0.001              |
| T078121     | <i>LSCAT167</i>      | 0.013              | 0.242      | 18.70     | 0                 | 0.142      | > 100     | < 0.001              |
| T332213     | <i>LSCAT55</i>       | 0.007              | 0.126      | 18.69     | 0                 | 0.049      | > 100     | < 0.001              |
| T100203     | <i>STCAT7</i>        | 0.059              | 1.075      | 18.11     | 0                 | 0.349      | > 100     | < 0.001              |
| T220458     | <i>CAT2182</i>       | 0.012              | 0.212      | 18.06     | 0.002             | 0.145      | 65.69     | < 0.001              |
| T332495     | <i>CAT971</i>        | 0.016              | 0.281      | 17.56     | 0.008             | 0.129      | 16.21     | < 0.001              |
| T286785     | <i>LINC00491.3</i>   | 0.008              | 0.132      | 17.34     | 0                 | 0.063      | > 100     | < 0.001              |
| T255259     | <i>CAT475.3</i>      | 0.009              | 0.148      | 17.08     | 0                 | 0.054      | > 100     | < 0.001              |
| T192655     | <i>CAT266.3*</i>     | 0.26               | 1.84       | 6.95      | 0                 | 1.49       | > 100     | < 0.001              |

<sup>#</sup>MiTranscriptome identifier; <sup>s</sup>unpaired *t*-test; \*selected based on the highest T/N ratio calculated using median expression. The lncRNAs with average expression in cancer higher than 0.1 FPKM are shown.

**Supplementary Table 4: Expression levels of 11 bladder cancer-associated lncRNAs that are described in literature, and for which expression data are available in the MiTranscriptome dataset**

| Transcript       | Ref  | Average expression* |            | T/N ratio | Median expression* |            | T/N ratio | P-value <sup>§</sup> |
|------------------|------|---------------------|------------|-----------|--------------------|------------|-----------|----------------------|
|                  |      | Benign (N)          | Cancer (T) |           | Benign (N)         | Cancer (T) |           |                      |
| <i>ANRIL</i>     | (17) | 0.01                | 0.166      | 14.27     | 0.005              | 0.04       | 7.02      | < 0.001              |
| <i>SChLAP1</i>   | (18) | 0.06                | 0.31       | 5.1       | 0                  | 0          | 1         | 0.014                |
| <i>HIF1A-AS2</i> | (19) | 0.02                | 0.07       | 3.5       | 0.02               | 0.02       | -1.20     | 0.001                |
| <i>BC072678</i>  | (20) | 0.05                | 0.18       | 3.49      | 0.04               | 0.06       | 1.58      | < 0.001              |
| <i>PCAT1</i>     | (21) | 0.01                | 0.04       | 2.94      | 0.01               | 0.02       | 1.97      | < 0.001              |
| <i>TINCR</i>     | (22) | 2.06                | 5.59       | 2.71      | 0.59               | 3.42       | 5.72      | < 0.001              |
| <i>MALAT1.2</i>  | (23) | 4.63                | 12.16      | 2.62      | 0.08               | 5.81       | 78.32     | 0.033                |
| <i>HOTAIR</i>    | (40) | 0.005               | 0.009      | 1.94      | 0                  | 0          | 1         | 0.133                |
| <i>TUG1.4</i>    | (24) | 11.99               | 22.93      | 1.91      | 8.89               | 18.34      | 2.06      | < 0.001              |
| <i>ZEB2NAT</i>   | (41) | 0.05                | 0.02       | -3,16     | 0.05               | 0          | > 100     | 0.001                |
| <i>HOXD-AS1</i>  | (42) | 1.49                | 1.18       | -1.26     | 0.25               | 0.52       | -2.1      | 0.631                |
| <i>NEAT1</i>     | (43) | 11.22               | 8.76       | -1.28     | 4.75               | 2.16       | 2.19      | 0.585                |

\*MiTranscriptome expression data; <sup>§</sup>unpaired *t*-test.

**Supplementary Table 5: Correlation of clinico-pathological parameters with expression levels of the three identified MIBC-associated lncRNAs**

| Parameter              | No* | CAT266             |                      | CAT1297            |                      | CAT1647            |                      |
|------------------------|-----|--------------------|----------------------|--------------------|----------------------|--------------------|----------------------|
|                        |     | Average expression | P-value <sup>§</sup> | Average expression | P-value <sup>§</sup> | Average expression | P-value <sup>§</sup> |
| Age (years)            |     |                    |                      |                    |                      |                    |                      |
| < 60                   | 31  | 1.601              | 0.407                | 0.111              | 0.426                | 0.115              | 0.210                |
| > 60                   | 91  | 1.922              |                      | 0.134              |                      | 0.164              |                      |
| Sex                    |     |                    |                      |                    |                      |                    |                      |
| Female                 | 34  | 2.169              | 0.259                | 0.079              | 0.008                | 0.125              | 0.311                |
| Male                   | 88  | 1.713              |                      | 0.147              |                      | 0.166              |                      |
| Lymph nodes            |     |                    |                      |                    |                      |                    |                      |
| Positive (N1–3)        | 40  | 2.049              | 0.412                | 0.130              | 0.940                | 0.176              | 0.745                |
| Negative (N0)          | 71  | 1.722              |                      | 0.129              |                      | 0.155              |                      |
| Stage                  |     |                    |                      |                    |                      |                    |                      |
| pT2                    | 30  | 1.979              | 0.746                | 0.147              | 0.718                | 0.288              | <b>0.015</b>         |
| pT3                    | 62  | 1.938              |                      | 0.117              |                      | 0.117              |                      |
| pT4                    | 16  | 1.529              |                      | 0.123              |                      | 0.117              |                      |
| Grade                  |     |                    |                      |                    |                      |                    |                      |
| low                    | 6   | 1.184              | 0.411                | 0.110              | 0.867                | 0.049              | <b>0.027</b>         |
| high                   | 115 | 1.863              |                      | 0.120              |                      | 0.144              |                      |
| Subtype                |     |                    |                      |                    |                      |                    |                      |
| Papillary              | 33  | 1.916              | 0.882                | 0.166              | 0.226                | 0.208              | 0.354                |
| Non-papillary          | 85  | 1.856              |                      | 0.115              |                      | 0.138              |                      |
| Smoking                |     |                    |                      |                    |                      |                    |                      |
| No smokers             | 28  | 1.717              | 0.308                | 0.097              | 0.127                | 0.091              | 0.147                |
| Current/former smokers | 88  | 2.156              |                      | 0.139              |                      | 0.175              |                      |

\*not all data available for all patients; <sup>§</sup>unpaired *t*-test.

**Supplementary Table 6: Univariate and multivariate analysis of prognostic factors in MIBC for overall survival**

| Prognostic factor      | Univariate analysis |             |         | Multivariate analysis |             |         |
|------------------------|---------------------|-------------|---------|-----------------------|-------------|---------|
|                        | Exp (B)             | 95% CI      | P value | Exp (B)               | 95% CI      | P value |
| CAT1297 expression     | 0.487               | 0.292–0.812 | 0.006   | 0.508                 | 0.284–0.909 | 0.022   |
| Age                    | 1.027               | 1.002–1.053 | 0.036   | 1.034                 | 1.004–1.064 | 0.026   |
| Gender                 | 0.967               | 0.553–1.691 | 0.906   | 0.719                 | 0.374–1.380 | 0.321   |
| Stage                  | 1.952               | 1.242–3.067 | 0.004   | 1.975                 | 1.188–3.285 | 0.009   |
| Lymph node metastasis* | 1.725               | 1.020–2.919 | 0.042   | 1.434                 | 0.374–2.478 | 0.197   |

\*At the time of diagnosis, CI-confidence intervals.

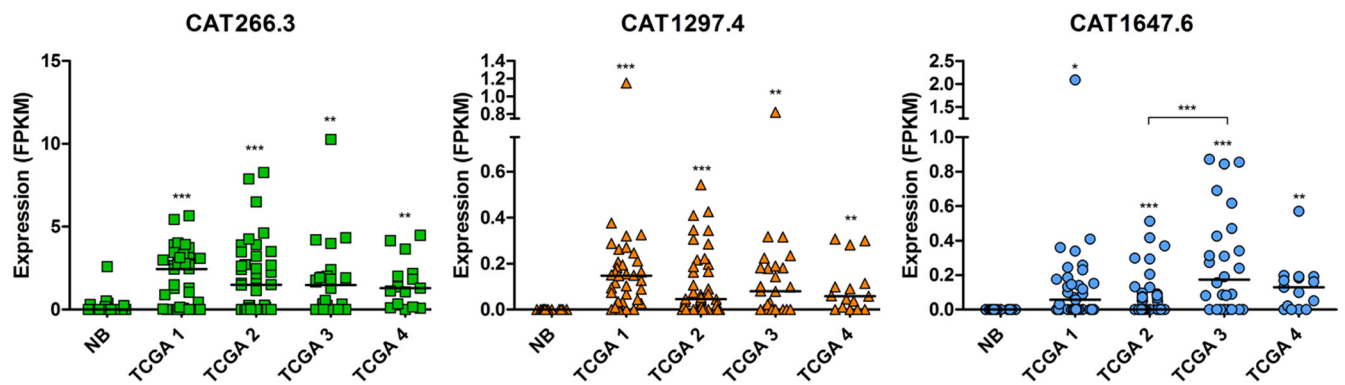

Supplementary Figure 1: Expression of *CAT266*, *CAT1297* and *CAT1647* in normal bladder (NB) and MIBC tumors divided into TCGA clusters (TCGA 1-4; unpaired *t*-test, \**p* < 0.05; \*\**p* < 0.01, \*\*\**p* < 0.001; lines represent the median).

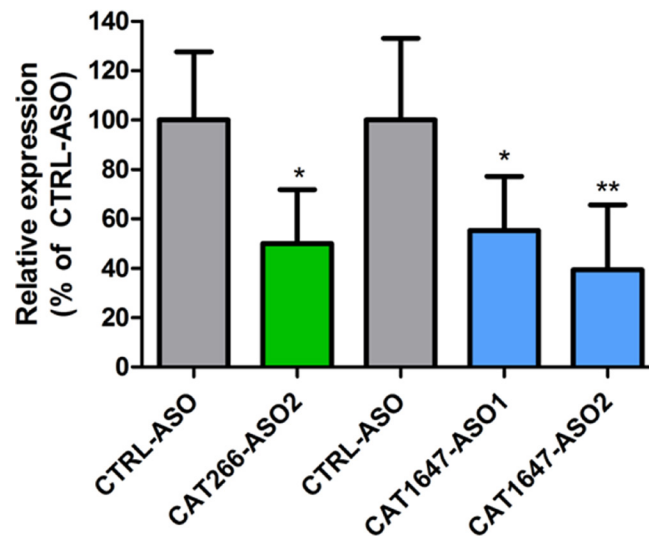

Supplementary Figure 2: Knockdown of lncRNAs expression in SW800 bladder cancer cell line (expressing *CAT266* and *CAT1647*) using ASOs. All data are compared to control ASO-transfected cells. (*t*-test, \**p* < 0.05, \*\*\**p* < 0.001, bars represent the mean ± SD).

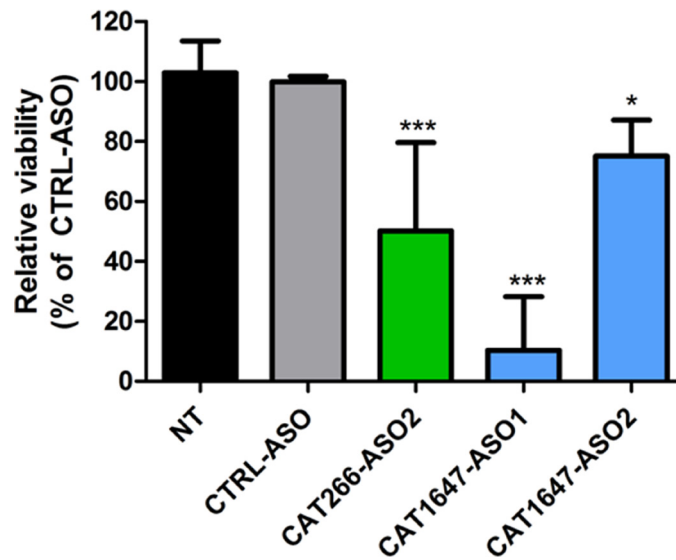

**Supplementary Figure 3: The effect of *CAT266* and *CAT1647* ASO-mediated knockdown in SW800 cells on cell viability.** All data are compared to control ASO-transfected cells. (*t*-test, \**p* < 0.05, \*\*\**p* < 0.001, bars represent the mean ± SD).

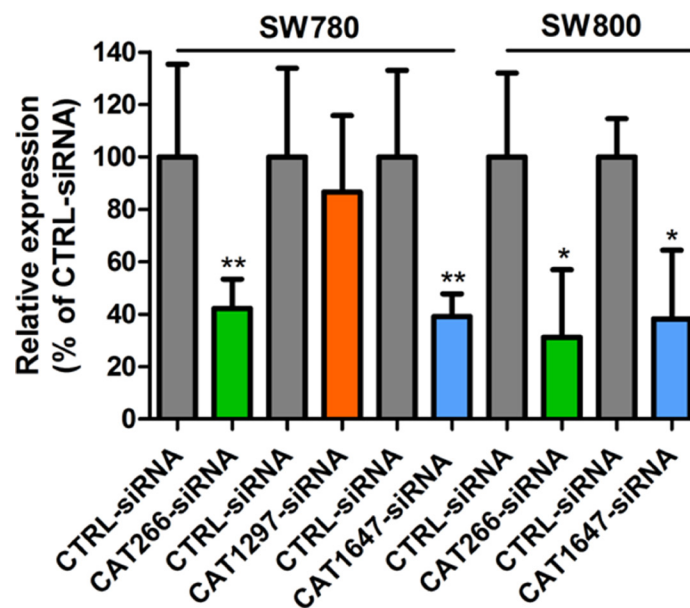

**Supplementary Figure 4: Knockdown of lncRNAs expression using siRNAs targeting *CAT266* (*CAT266*-siRNA), *CAT1297* (*CAT1297*-siRNA1 and *CAT1297*-siRNA2 mix) and *CAT1647* (*CAT1647*-siRNA1 and *CAT1647*-siRNA2 mix) in SW780 and SW800 bladder cancer cell lines.** All data are compared to control siRNA-transfected cells (*t*-test, \**p* < 0.05; \*\**p* < 0.01, bars represent the mean ± SD).

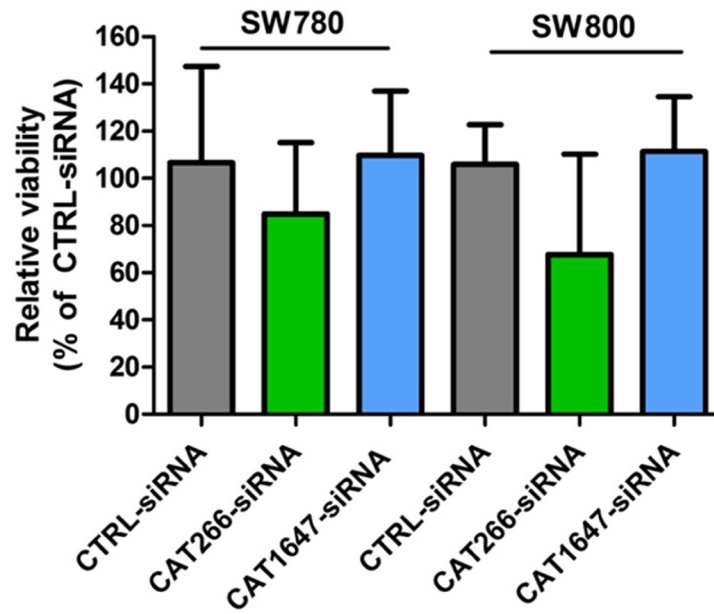

**Supplementary Figure 5: The effect of *CAT266* (*CAT266-siRNA1*) and *CAT1647* (*CAT1647-siRNA1* and *CAT1647-siRNA2* mix) siRNA-mediated knockdown on cell viability in SW780 and SW800 bladder cancer cell lines. All data are compared to control siRNA-transfected cells (*t*-test, bars represent the mean  $\pm$  SD).**
